# Supplementary material
Source: MDPI journal article supplement (https://www.mdpi.com/1996-1073/14/24/8419)
Supplement: s1 [file s1]

Article

# Effects of Inhibitory Compounds Present in Lignocellulosic Biomass Hydrolysates on the Growth of *Bacillus subtilis*

Lucas van der Maas <sup>1,†</sup>, Jasper L. S. P. Driessen <sup>2,†</sup> and Solange I. Mussatto <sup>1,\*</sup>

<sup>1</sup> Department of Biotechnology and Biomedicine, Technical University of Denmark, Søtofts Plads, Building 223, 2800 Kongens Lyngby, Denmark; lucmaa@dtu.dk

<sup>2</sup> Novo Nordisk Foundation Center for Biosustainability, Technical University of Denmark, Kemitorvet, Building 220, 2800 Kongens Lyngby, Denmark; jasdri@biosustain.dtu.dk

\* Correspondence: smussatto@dtu.dk or solangemussatto@hotmail.com

† The authors contributed equally to this work.

## Supplementary Materials

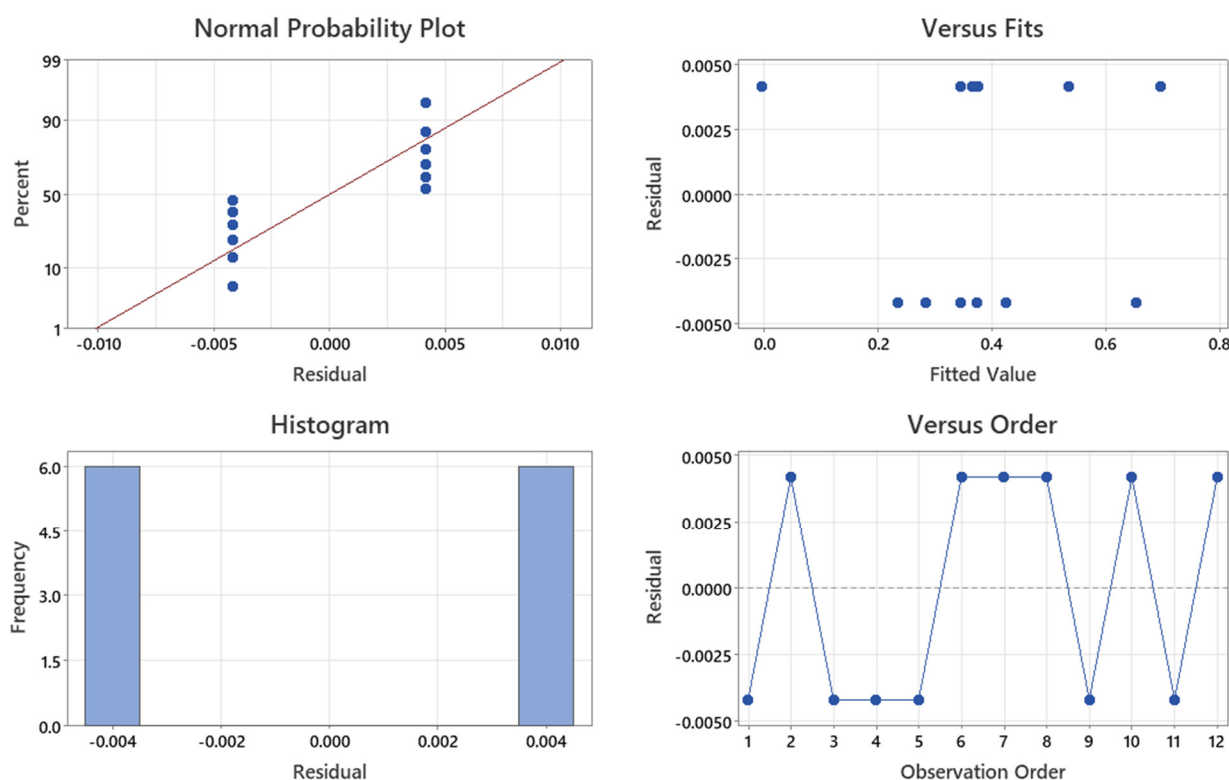

**Figure S1.** Residual plots from Plackett Burman design.

**Table S1.** Coded coefficients of Plackett Burman.

| Term          | Effect   | Coef     | SE Coef | T-Value | P-Value | VIF  |
|---------------|----------|----------|---------|---------|---------|------|
| Constant      |          | 0.38583  | 0.00417 | 92.60   | 0.007   |      |
| 5HMF          | 0.06500  | 0.03250  | 0.00417 | 7.80    | 0.081   | 1.00 |
| Furfural      | −0.17167 | −0.08583 | 0.00417 | −20.60  | 0.031   | 1.00 |
| Acetic acid   | −0.01167 | −0.00583 | 0.00417 | −1.40   | 0.395   | 1.00 |
| Vanillin      | −0.14500 | −0.07250 | 0.00417 | −17.40  | 0.037   | 1.00 |
| Vanillic acid | −0.00167 | −0.00083 | 0.00417 | −0.20   | 0.874   | 1.00 |
| Benzoic acid  | −0.23833 | −0.11917 | 0.00417 | −28.60  | 0.022   | 1.00 |
| 4HBA          | −0.01833 | −0.00917 | 0.00417 | −2.20   | 0.272   | 1.00 |
| TFA           | 0.03833  | 0.01917  | 0.00417 | 4.60    | 0.136   | 1.00 |
| Syring        | −0.11500 | −0.05750 | 0.00417 | −13.80  | 0.046   | 1.00 |
| PCA           | −0.02167 | −0.01083 | 0.00417 | −2.60   | 0.234   | 1.00 |

**Table S2.** Analysis of variance from Plackett Burman.

| Source        | DF | Adj SS   | Adj MS   | F-Value | P-Value |
|---------------|----|----------|----------|---------|---------|
| Model         | 10 | 0.381483 | 0.038148 | 183.11  | 0.057   |
| Linear        | 10 | 0.381483 | 0.038148 | 183.11  | 0.057   |
| 5HMF          | 1  | 0.012675 | 0.012675 | 60.84   | 0.081   |
| Furfural      | 1  | 0.088408 | 0.088408 | 424.36  | 0.031   |
| Acetic acid   | 1  | 0.000408 | 0.000408 | 1.96    | 0.395   |
| Vanillin      | 1  | 0.063075 | 0.063075 | 302.76  | 0.037   |
| Vanillic acid | 1  | 0.000008 | 0.000008 | 0.04    | 0.874   |
| Benzoic acid  | 1  | 0.170408 | 0.170408 | 817.96  | 0.022   |
| 4HBA          | 1  | 0.001008 | 0.001008 | 4.84    | 0.272   |
| TFA           | 1  | 0.004408 | 0.004408 | 21.16   | 0.136   |
| Syring        | 1  | 0.039675 | 0.039675 | 190.44  | 0.046   |
| PCA           | 1  | 0.001408 | 0.001408 | 6.76    | 0.234   |
| Error         | 1  | 0.000208 | 0.000208 |         |         |
| Total         | 11 | 0.381692 |          |         |         |
